# Supplementary material for: A combined experimental and computational study on the deactivation of a photo-excited 2,2′-pyridylbenzimidazole–water complex via excited-state proton transfer
Source: Royal Society of Chemistry journal article supplement (doi:10.1039/d2cp01121b), 2022-01-01
Supplement: d2cp01121b1.pdf [file d2cp01121b1.pdf]

*Electronic Supplementary Information*

A combined experimental and computational study on the deactivation of a photo-excited 2,2'-pyridylbenzimidazole-water complex via excited-state proton transfer

*Saurabh Khodia and Surajit Maity\**

Department of Chemistry, Indian Institute of Technology Hyderabad, Kandi, Sangareddy, India, 502285

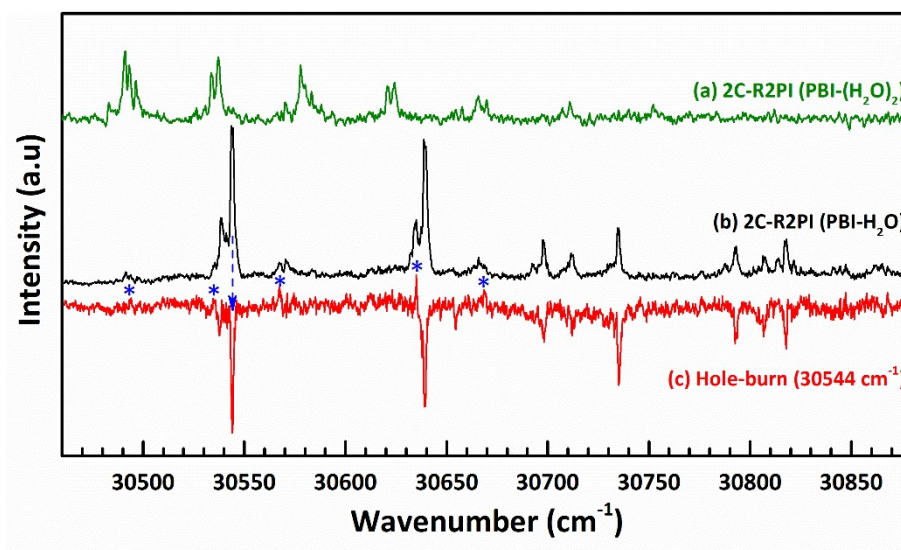

**SI Figure S1:** (a) Two-color resonant two-photon ionization (2C-R2PI) spectrum of PBI-(H<sub>2</sub>O)<sub>2</sub> (b) 2C-R2PI spectrum of PBI-H<sub>2</sub>O and UV/UV hole-burning spectrum of PBI-H<sub>2</sub>O (ionization at 266 nm). The UV hole-burning laser was fixed at the most intense band at 30544 cm<sup>-1</sup>, shown with the blue dotted arrow. The \* indicates the presence of fragmentation bands originating from the larger cluster present in the molecular beam.

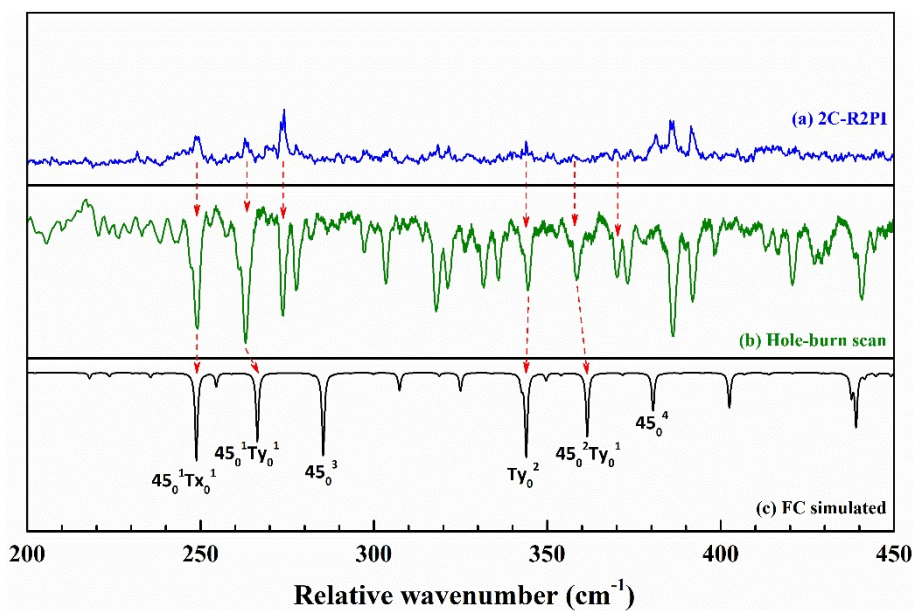

**SI Figure S2:** (a) Two-color resonant two-photon ionization (2C-R2PI) spectrum of PBI-H<sub>2</sub>O (b) UV–UV hole-burn spectrum obtained by scanning hole-burning laser coming 100 ns prior to the 2C-R2PI measurement (probe laser is fixed at  $S_1 \leftarrow S_0$  transition 30544 cm<sup>-1</sup>) and (c) Franck–Condon vibronic spectrum with suggested band assignment, simulated using *FC-LabWin* software based on the DFT-D4(B3LYP)/def2-TZVPP calculation. The relative zero is the band origin of the PBI-H<sub>2</sub>O complex at 30544 cm<sup>-1</sup>.

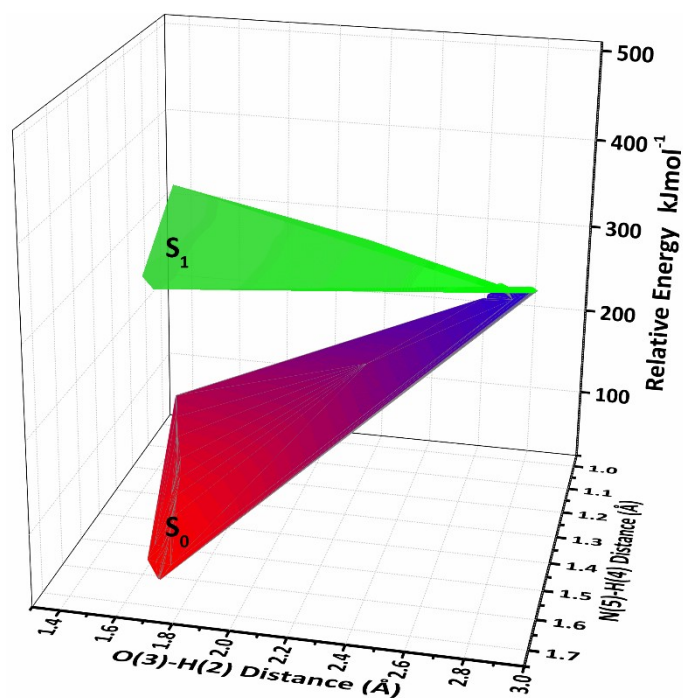

**SI Figure S3:** 2D potential energy surface scan ( $S_0$ : red and  $S_1$ : green) along the O(3)-H(2) and the N(5)-H(4) distance. The relative energies for the surface are given in kJ mol<sup>-1</sup>, calculated at the DFT-D4/B3-LYP (def2-TZVPP) level of theory. The relative zero is the electronic energy of the relaxed geometry-optimized PBI-H<sub>2</sub>O (normal form) complex in the ground state.

**SI Figure S4:** Geometry optimized structures of PBI-H<sub>2</sub>O in the S<sub>1</sub> state calculated using B3LYP-D4/def2-TZVPP and ADC(2) (MP2)/cc-pVDZ level of theory.

|                                                                     | ADC(2) (MP2)/cc-pVDZ | B3LYP-D4/def2-TZVPP |
|---------------------------------------------------------------------|----------------------|---------------------|
| Structure 'a' (Normal form)                                         |                      |                     |
| Structure 'b' (Tautomer product)                                    |                      |                     |
| Structure 'c' (proton transfer product)                             |                      |                     |
| TS <sub>ab</sub><br>(highest energy structure along the path a → b) |                      |                     |
| TS <sub>ac</sub><br>(highest energy structure along the path a → c) |                      |                     |

**SI Table S1:** Excited State NBO analysis of structure 'a', 'b', 'c', 'TS<sub>ab</sub>' and 'TS<sub>ac</sub>' calculated at DFT-D4/B3-LYP (def2-TZVPP) level of theory.  $\rho_R$  is the absolute charge on the solvent molecule. Structure 'c' and 'TS<sub>ac</sub>' show charge accumulation on the solvent molecule, depicting the formation of charge separated complex.

| Structure        | $\rho_R$ (charge on solvent) |
|------------------|------------------------------|
| a                | -0.02146                     |
| b                | -0.01661                     |
| c                | <b>-0.86533</b>              |
| TS <sub>ab</sub> | 0.05517                      |
| TS <sub>ac</sub> | <b>-0.61561</b>              |

**SI Table S2:** Coordinates of the optimized structures of PBI-H<sub>2</sub>O complexes in ground state S<sub>0</sub> and excited state S<sub>1</sub>, calculated using B3LYP-D4/def2-TZVPP and ADC(2) (MP2)/cc-pVDZ level of theory. Here 'a': normal form, 'b': tautomer form and 'c': proton transferred form of PBI-H<sub>2</sub>O cluster.

| PBI-H <sub>2</sub> O complex structures calculated at DFT-D4 (B3LYP)/def2-TZVPP level of theory |         |         |         |                                 |         |         |         |                                 |         |         |          |
|-------------------------------------------------------------------------------------------------|---------|---------|---------|---------------------------------|---------|---------|---------|---------------------------------|---------|---------|----------|
| Structure 'a' (S <sub>0</sub> )                                                                 |         |         |         | Structure 'b' (S <sub>0</sub> ) |         |         |         | Structure 'c' (S <sub>0</sub> ) |         |         |          |
| C                                                                                               | 2.9805  | 1.3342  | -0.081  | C                               | 2.9931  | 1.395   | -0.0827 | C                               | 3.0016  | 1.3592  | -0.0281  |
| H                                                                                               | -5.5761 | 0.248   | 0.0603  | H                               | -5.5612 | 0.2877  | 0.0739  | H                               | -5.5618 | 0.2003  | -0.0165  |
| H                                                                                               | 5.0378  | -1.3688 | 0.0851  | H                               | 5.0232  | -1.3291 | 0.0863  | H                               | 5.0543  | -1.3519 | 0.0018   |
| C                                                                                               | -3.7929 | -0.9424 | 0.0913  | C                               | -3.8053 | -0.9105 | 0.079   | C                               | -3.7825 | -0.9759 | 0.0102   |
| C                                                                                               | -1.7617 | 0.1341  | 0.0176  | C                               | -1.6929 | 0.1821  | 0.0108  | C                               | -1.7143 | 0.1446  | 0.0136   |
| C                                                                                               | 4.1414  | 0.5836  | -0.0374 | C                               | 4.1396  | 0.6357  | -0.0376 | C                               | 4.1577  | 0.6064  | -0.0229  |
| N                                                                                               | -2.4612 | -1.0098 | 0.0765  | N                               | -2.4586 | -0.938  | 0.0554  | N                               | -2.4444 | -0.9893 | 0.0196   |
| C                                                                                               | -4.4957 | 0.2508  | 0.045   | C                               | -4.4827 | 0.2773  | 0.0529  | C                               | -4.4827 | 0.2074  | -0.0057  |
| C                                                                                               | 2.9092  | -1.5159 | 0.1001  | C                               | 2.898   | -1.4642 | 0.096   | C                               | 2.9291  | -1.5032 | 0.019    |
| H                                                                                               | 3.0035  | 2.4129  | -0.1488 | H                               | 3.0285  | 2.474   | -0.149  | H                               | 3.0259  | 2.4398  | -0.0466  |
| H                                                                                               | 5.1009  | 1.0817  | -0.0717 | H                               | 5.1058  | 1.1217  | -0.069  | H                               | 5.1187  | 1.1026  | -0.0375  |
| H                                                                                               | -4.3168 | -1.8896 | 0.1448  | H                               | -4.2906 | -1.8742 | 0.1204  | H                               | -4.2492 | -1.9507 | 0.0135   |
| H                                                                                               | -1.7771 | 2.2692  | -0.0796 | H                               | -1.7465 | 2.3071  | -0.06   | H                               | -1.7791 | 2.2727  | -0.0072  |
| C                                                                                               | -2.3903 | 1.3825  | -0.033  | C                               | -2.3603 | 1.421   | -0.0221 | C                               | -2.3783 | 1.3756  | -0.0011  |
| C                                                                                               | 1.7416  | -0.7582 | 0.0552  | C                               | 1.7137  | -0.7099 | 0.0491  | C                               | 1.7565  | -0.7451 | 0.0144   |
| N                                                                                               | 0.4121  | -1.1004 | 0.0814  | N                               | 0.4121  | -1.0938 | 0.0744  | N                               | 0.438   | -1.0985 | 0.0258   |
| C                                                                                               | 4.106   | -0.8205 | 0.052   | C                               | 4.0917  | -0.7793 | 0.0514  | C                               | 4.1209  | -0.8051 | 2.00E-04 |
| H                                                                                               | 0.0238  | -2.042  | 0.1298  | H                               | -0.3319 | -2.6092 | 0.1533  | H                               | 0.0073  | -2.0056 | 0.0644   |
| H                                                                                               | -4.2795 | 2.3907  | -0.0577 | H                               | -4.239  | 2.4208  | -0.0245 | H                               | -4.2767 | 2.3512  | -0.0225  |
| H                                                                                               | 2.8855  | -2.5945 | 0.1721  | H                               | 2.8696  | -2.5434 | 0.1679  | H                               | 2.9028  | -2.5836 | 0.0334   |
| C                                                                                               | -0.3011 | 0.0689  | 0.0102  | C                               | -0.2646 | 0.0864  | 0.005   | C                               | -0.268  | 0.0708  | 0.0103   |
| C                                                                                               | -3.771  | 1.4367  | -0.0198 | C                               | -3.7318 | 1.4658  | -0.0014 | C                               | -3.7571 | 1.4027  | -0.0103  |
| C                                                                                               | 1.7605  | 0.6544  | -0.0339 | C                               | 1.7585  | 0.7222  | -0.0386 | C                               | 1.7783  | 0.6763  | -0.0091  |
| N                                                                                               | 0.4718  | 1.1347  | -0.0589 | N                               | 0.4923  | 1.203   | -0.0633 | N                               | 0.4962  | 1.1556  | -0.011   |
| O                                                                                               | -1.1659 | -3.4881 | 0.1831  | O                               | -1.0809 | -3.285  | 0.1756  | H                               | -1.9876 | -1.8877 | 0.0694   |
| H                                                                                               | -1.7712 | -2.7139 | 0.1275  | H                               | -1.9931 | -1.8729 | 0.0631  | O                               | -1.176  | -3.0793 | 0.0454   |
| H                                                                                               | -1.292  | -3.9873 | -0.6276 | H                               | -0.9544 | -3.8592 | -0.5838 | H                               | -1.2558 | -3.7983 | 0.6724   |
| Structure 'a' (S <sub>1</sub> )                                                                 |         |         |         | Structure 'b' (S <sub>1</sub> ) |         |         |         | Structure 'c' (S <sub>1</sub> ) |         |         |          |
| C                                                                                               | 2.999   | 1.2986  | -0.0575 | C                               | 3.0259  | 1.357   | -0.1752 | C                               | 3.162   | 1.6192  | 0.1096   |
| H                                                                                               | -5.5843 | 0.0888  | 0.0951  | H                               | -5.6023 | 0.2126  | 0.0553  | H                               | -5.4312 | 0.456   | -0.041   |
| H                                                                                               | 5.024   | -1.4864 | 0.0908  | H                               | 5.0186  | -1.4144 | 0.1705  | H                               | 5.2556  | -1.0517 | -0.1171  |
| C                                                                                               | -3.7481 | -0.9949 | 0.1254  | C                               | -3.8157 | -0.9177 | 0.0255  | C                               | -3.6872 | -0.724  | -0.094   |
| C                                                                                               | -1.762  | 0.1979  | 0.0021  | C                               | -1.757  | 0.3059  | 0.028   | C                               | -1.5511 | 0.3979  | -0.047   |
| C                                                                                               | 4.1869  | 0.4776  | -0.0121 | C                               | 4.2021  | 0.5397  | -0.0779 | C                               | 4.3355  | 0.8827  | 0.0539   |

|   |         |         |         |   |         |         |         |   |         |         |          |
|---|---------|---------|---------|---|---------|---------|---------|---|---------|---------|----------|
| N | -2.4088 | -1.0315 | 0.0953  | N | -2.4318 | -0.8877 | 0.0147  | N | -2.3163 | -0.7723 | -0.1082  |
| C | -4.5066 | 0.1537  | 0.0638  | C | -4.5219 | 0.2634  | 0.0487  | C | -4.3527 | 0.456   | -0.0489  |
| C | 2.8705  | -1.5383 | 0.0827  | C | 2.8612  | -1.4538 | 0.1894  | C | 3.1225  | -1.2175 | -0.1585  |
| H | 3.0843  | 2.3746  | -0.1113 | H | 3.1107  | 2.4255  | -0.3168 | H | 3.1702  | 2.6947  | 0.2192   |
| H | 5.1496  | 0.9683  | -0.0312 | H | 5.1706  | 1.0146  | -0.1472 | H | 5.2885  | 1.3906  | 0.1165   |
| H | -4.2386 | -1.9598 | 0.2064  | H | -4.2693 | -1.8939 | 0.018   | H | -4.1926 | -1.6727 | -0.135   |
| H | -1.8995 | 2.3241  | -0.1354 | H | -1.859  | 2.3911  | 0.0673  | H | -1.6221 | 2.5025  | 0.0568   |
| C | -2.462  | 1.4038  | -0.0649 | C | -2.4265 | 1.4749  | 0.0577  | C | -2.2301 | 1.6125  | 0.0061   |
| C | 1.7174  | -0.7313 | 0.0369  | C | 1.7172  | -0.657  | 0.0965  | C | 1.9526  | -0.4751 | -0.107   |
| N | 0.4116  | -1.038  | 0.047   | N | 0.4023  | -0.9946 | 0.1512  | N | 0.6165  | -0.824  | -0.1686  |
| C | 4.1192  | -0.8986 | 0.0559  | C | 4.1179  | -0.822  | 0.0989  | C | 4.319   | -0.5127 | -0.0771  |
| H | -0.009  | -1.9877 | 0.0654  | H | -0.2877 | -2.7091 | 0.1684  | H | 0.2648  | -1.7997 | -0.2285  |
| H | -4.3939 | 2.3344  | -0.0897 | H | -4.4141 | 2.4161  | 0.0812  | H | -4.1139 | 2.6237  | 0.0359   |
| H | 2.7917  | -2.6147 | 0.1406  | H | 2.7844  | -2.5232 | 0.332   | H | 3.1147  | -2.2952 | -0.2504  |
| C | -0.3198 | 0.1854  | -0.0086 | C | -0.2545 | 0.214   | 0.0041  | C | -0.1243 | 0.3437  | -0.0502  |
| C | -3.8401 | 1.4089  | -0.0383 | C | -3.87   | 1.4863  | 0.0653  | C | -3.6073 | 1.6715  | 8.00E-04 |
| C | 1.7796  | 0.6867  | -0.0308 | C | 1.8132  | 0.7418  | -0.0848 | C | 1.9488  | 0.9326  | 0.0266   |
| N | 0.4939  | 1.2129  | -0.0571 | N | 0.5053  | 1.2615  | -0.1447 | N | 0.6606  | 1.4061  | 0.0603   |
| O | -1.0664 | -3.318  | 0.1707  | O | -0.9619 | -3.4218 | 0.13    | O | -1.6466 | -3.5446 | 0.4695   |
| H | -1.7085 | -2.5296 | 0.156   | H | -1.9335 | -1.7724 | 0.0086  | H | -1.8928 | -1.7134 | -0.0031  |
| H | -1.258  | -3.8359 | -0.6147 | H | -0.792  | -3.9056 | -0.6819 | H | -1.5452 | -4.2797 | -0.1474  |

**PBI-H<sub>2</sub>O complex structures calculated at ADC(2) (MP2)/cc-pVDZ level of theory**

| Structure 'a' (S <sub>0</sub> ) |          |         | Structure 'b' (S <sub>0</sub> ) |   |         | Structure 'c' (S <sub>0</sub> ) |         |   |         |         |         |
|---------------------------------|----------|---------|---------------------------------|---|---------|---------------------------------|---------|---|---------|---------|---------|
| C                               | 2.9861   | 1.3388  | -0.0863                         | C | 2.9803  | 1.3395                          | -0.11   | C | 2.997   | 1.3228  | -0.0971 |
| H                               | -5.6262  | 0.2617  | 0.062                           | H | -5.6206 | 0.2416                          | 0.0841  | H | -5.6236 | 0.1864  | 0.0847  |
| H                               | 5.0646   | -1.3962 | 0.0895                          | H | 5.0479  | -1.4024                         | 0.1105  | H | 5.0614  | -1.4213 | 0.1115  |
| C                               | -3.8284  | -0.9482 | 0.1124                          | C | -3.8505 | -0.9815                         | 0.0918  | C | -3.8257 | -1.0079 | 0.1031  |
| C                               | -1.7776  | 0.125   | 0.0239                          | C | -1.7182 | 0.1044                          | 0.0138  | C | -1.743  | 0.1137  | 0.0067  |
| C                               | 4.1572   | 0.5792  | -0.041                          | C | 4.1448  | 0.5762                          | -0.0508 | C | 4.1616  | 0.5573  | -0.0393 |
| N                               | -2.4798  | -1.0346 | 0.1005                          | N | -2.4946 | -1.0158                         | 0.0646  | N | -2.477  | -1.0253 | 0.0747  |
| C                               | -4.5324  | 0.2615  | 0.0476                          | C | -4.5287 | 0.2295                          | 0.0604  | C | -4.5312 | 0.1933  | 0.0588  |
| C                               | 2.9138   | -1.5443 | 0.1078                          | C | 2.8967  | -1.544                          | 0.1254  | C | 2.9115  | -1.5635 | 0.1193  |
| H                               | 3.0077   | 2.4306  | -0.1587                         | H | 3.0103  | 2.4306                          | -0.1981 | H | 3.0253  | 2.4138  | -0.1784 |
| H                               | 5.1291   | 1.0823  | -0.0787                         | H | 5.1198  | 1.0744                          | -0.0932 | H | 5.1365  | 1.055   | -0.0755 |
| H                               | -4.3658  | -1.9016 | 0.1789                          | H | -4.348  | -1.9534                         | 0.1403  | H | -4.3002 | -1.9913 | 0.1648  |
| H                               | -1.7666  | 2.2772  | -0.1052                         | H | -1.742  | 2.246                           | -0.0692 | H | -1.7872 | 2.2588  | -0.0969 |
| C                               | -2.4023  | 1.3901  | -0.0454                         | C | -2.3803 | 1.3603                          | -0.0248 | C | -2.4063 | 1.3602  | -0.0425 |
| C                               | 1.7336   | -0.7747 | 0.0606                          | C | 1.7005  | -0.7863                         | 0.0649  | C | 1.7307  | -0.7918 | 0.0603  |
| N                               | 0.4015   | -1.1162 | 0.0896                          | N | 0.392   | -1.1893                         | 0.0995  | N | 0.4062  | -1.1431 | 0.0855  |
| C                               | 4.1213   | -0.841  | 0.0549                          | C | 4.1039  | -0.8478                         | 0.0658  | C | 4.1194  | -0.8644 | 0.0676  |
| H                               | 4.00E-04 | -2.0687 | 0.144                           | H | -0.4099 | -2.6912                         | 0.2263  | H | -0.0654 | -2.044  | 0.1329  |
| H                               | -4.3077  | 2.4256  | -0.0861                         | H | -4.2741 | 2.394                           | -0.0311 | H | -4.3245 | 2.3587  | -0.0551 |
| H                               | 2.8889   | -2.636  | 0.185                           | H | 2.8719  | -2.6355                         | 0.2179  | H | 2.8795  | -2.654  | 0.2041  |
| C                               | -0.3098  | 0.0593  | 0.0146                          | C | -0.2805 | 0.006                           | 0.0057  | C | -0.2884 | 0.0353  | -0.0039 |
| C                               | -3.7981  | 1.458   | -0.0339                         | C | -3.7696 | 1.4229                          | -0.0031 | C | -3.8013 | 1.398   | -0.0182 |
| C                               | 1.7511   | 0.6519  | -0.0346                         | C | 1.7381  | 0.6554                          | -0.0511 | C | 1.7571  | 0.6399  | -0.0466 |
| N                               | 0.4645   | 1.1509  | -0.0613                         | N | 0.4653  | 1.1499                          | -0.0859 | N | 0.4774  | 1.1432  | -0.084  |
| O                               | -1.0826  | -3.5017 | 0.1702                          | O | -1.1867 | -3.3309                         | 0.1593  | O | -1.2008 | -3.0663 | 0.1659  |
| H                               | -1.7376  | -2.7685 | 0.2138                          | H | -2.0222 | -1.9759                         | 0.0762  | H | -1.9991 | -1.9286 | 0.0869  |
| H                               | -1.183   | -3.8093 | -0.7416                         | H | -1.0426 | -3.7272                         | -0.7125 | H | -1.2019 | -3.5721 | -0.6599 |
| Structure 'a' (S <sub>1</sub> ) |          |         | Structure 'b' (S <sub>1</sub> ) |   |         | Structure 'c' (S <sub>1</sub> ) |         |   |         |         |         |
| C                               | 3.0011   | 1.327   | -0.0725                         | C | 3.0106  | 1.33                            | -0.0908 | C | 3.1477  | 1.6479  | -0.1098 |
| H                               | -5.6264  | 0.1345  | 0.0742                          | H | -5.6467 | 0.1625                          | 0.1251  | H | -5.5222 | 0.4740  | 0.1341  |
| H                               | 5.0535   | -1.4823 | 0.0925                          | H | 5.0512  | -1.468                          | 0.1235  | H | 5.2392  | -1.0690 | 0.2278  |
| C                               | -3.7727  | -0.9895 | 0.1263                          | C | -3.8495 | -0.9808                         | 0.1649  | C | -3.7520 | -0.7044 | 0.1324  |
| C                               | -1.7565  | 0.1776  | 0.0153                          | C | -1.7554 | 0.2078                          | 0.0027  | C | -1.6038 | 0.4422  | 0.0192  |
| C                               | 4.17     | 0.5061  | -0.0252                         | C | 4.1986  | 0.5089                          | -0.0276 | C | 4.3282  | 0.8901  | -0.0152 |
| N                               | -2.4245  | -1.0464 | 0.1095                          | N | -2.4686 | -0.9987                         | 0.1264  | N | -2.3669 | -0.7458 | 0.0866  |

|   |         |         |           |   |         |         |         |   |         |         |         |
|---|---------|---------|-----------|---|---------|---------|---------|---|---------|---------|---------|
| C | -4.5335 | 0.1865  | 0.0542    | C | -4.5532 | 0.2034  | 0.0856  | C | -4.4292 | 0.4849  | 0.0884  |
| C | 2.8861  | -1.5815 | 0.0975    | C | 2.8671  | -1.5373 | 0.1244  | C | 3.0777  | -1.2097 | 0.2294  |
| H | 3.0727  | 2.4165  | -0.1362   | H | 3.0826  | 2.4193  | -0.1729 | H | 3.1723  | 2.7343  | -0.2418 |
| H | 5.1505  | 0.9948  | -0.0536   | H | 5.1766  | 1.001   | -0.0629 | H | 5.2964  | 1.3992  | -0.0748 |
| H | -4.281  | -1.9607 | 0.2052    | H | -4.3311 | -1.9575 | 0.2668  | H | -4.2514 | -1.6748 | 0.2020  |
| H | -1.8709 | 2.3469  | -0.1304   | H | -1.8454 | 2.3202  | -0.1625 | H | -1.6869 | 2.5717  | -0.1025 |
| C | -2.4603 | 1.4267  | -0.0605   | C | -2.4473 | 1.4084  | -0.0759 | C | -2.3057 | 1.6704  | -0.0382 |
| C | 1.7188  | -0.7732 | 0.05      | C | 1.7169  | -0.7418 | 0.0632  | C | 1.9087  | -0.4466 | 0.1378  |
| N | 0.416   | -1.0848 | 0.0653    | N | 0.3943  | -1.1067 | 0.0868  | N | 0.5594  | -0.7846 | 0.1512  |
| C | 4.1199  | -0.9131 | 0.0575    | C | 4.1313  | -0.8773 | 0.0766  | C | 4.2990  | -0.5126 | 0.1511  |
| H | -0.0142 | -2.0452 | 0.0965    | H | -0.3643 | -2.8513 | 0.181   | H | 0.1688  | -1.7467 | 0.3247  |
| H | -4.3995 | 2.3772  | -0.0989   | H | -4.3986 | 2.4037  | -0.1092 | H | -4.2161 | 2.6872  | -0.0486 |
| H | 2.8153  | -2.6715 | 0.1659    | H | 2.7973  | -2.6274 | 0.2083  | H | 3.0544  | -2.2973 | 0.3589  |
| C | -0.3386 | 0.1698  | -1.00E-04 | C | -0.2887 | 0.1392  | 0.0016  | C | -0.1666 | 0.3957  | 0.0294  |
| C | -3.8461 | 1.4334  | -0.0421   | C | -3.86   | 1.4538  | -0.0444 | C | -3.6915 | 1.7282  | -0.0098 |
| C | 1.7621  | 0.6935  | -0.0334   | C | 1.7963  | 0.6884  | -0.0422 | C | 1.9146  | 0.9736  | -0.0282 |
| N | 0.4893  | 1.2315  | -0.0633   | N | 0.4824  | 1.2174  | -0.0803 | N | 0.6260  | 1.4785  | -0.0919 |
| O | -1.0229 | -3.3758 | 0.1715    | O | -1.0558 | -3.5437 | 0.1031  | O | -0.8350 | -3.7820 | -0.2671 |
| H | -1.686  | -2.6276 | 0.2338    | H | -1.9875 | -1.9078 | 0.1546  | H | -1.9072 | -1.6656 | 0.0633  |
| H | -1.1999 | -3.7193 | -0.7161   | H | -1.0504 | -3.7164 | -0.849  | H | -1.6435 | -4.0076 | -0.7857 |
